# Supplementary material for: Okadaic Acid Detection through a Rapid and Sensitive Amplified Luminescent Proximity Homogeneous Assay
Source: MDPI journal article supplement (doi:10.3390/toxins15080501), 2023-08-14
Supplement: s1 [file s1]

**Table S1.** AlphaLISA detection of shellfish samples.

| Sample category | Sample   | AlphaLISA (ng/mL) | HPLC (ng/mL) |
|-----------------|----------|-------------------|--------------|
| Scallop         | Sample 1 | 0.77              | 1.05         |
|                 | Sample 2 | 3.75              | 4.99         |
|                 | Sample 3 | 17.96             | 15.04        |
|                 | Sample 4 | 22.05             | 25.01        |
| Mussel          | Sample 1 | 1.67              | 0.99         |
|                 | Sample 2 | 4.16              | 5.38         |
|                 | Sample 3 | 18.89             | 14.97        |
|                 | Sample 4 | 25.63             | 29.98        |
| Oyster          | Sample 1 | 1.75              | 0.70         |
|                 | Sample 2 | 0.65              | 1.00         |
|                 | Sample 3 | 9.01              | 9.99         |
|                 | Sample 4 | 14.97             | 19.97        |

**Table S2.** AlphaLISA detection of phytoplankton samples.

| Sample   | AlphaLISA (ng/mL) | HPLC (ng/mL) |
|----------|-------------------|--------------|
| Sample 1 | 28.46             | 26.17        |
| Sample 2 | 25.25             | 33.08        |
| Sample 3 | 7.41              | 11.56        |
| Sample 4 | 50.85             | 41.75        |
| Sample 5 | 11.25             | 18.11        |

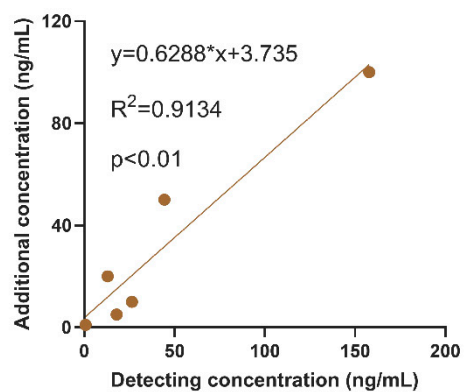

**Figure S1.** OA-AlphaLISA detection of seawater samples.
